# Supplementary material
Source: PubMed Central journal article supplement (PMC8665145)
Supplement: NIHMS1754783-supplement-1.pdf [file NIHMS1754783-supplement-1.pdf]

## Supplemental

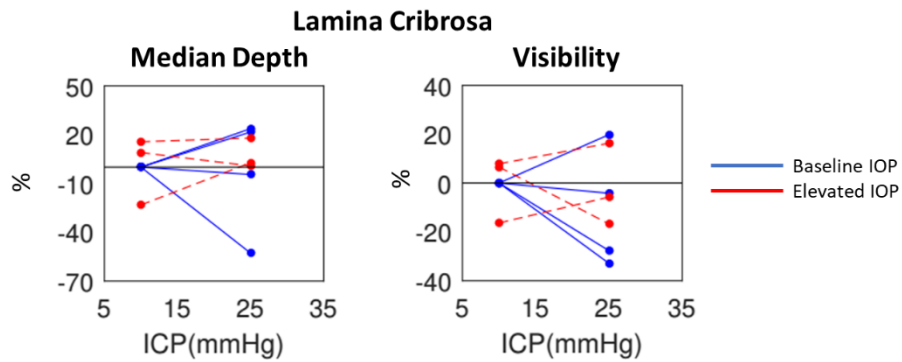

**Supplemental Figure 1:** Percentage changes of lamina median depth and lamina visibility with respect to baseline values due to ICP elevation at baseline IOP (blue) and elevated IOP (red). In some cases, changes in ICP have substantial effects on both lamina depth and visibility, often quite different depending on the level of IOP. Each line represents the estimate for one eye.

**Table 1:** Baseline parameters of the scleral canal, measured at the Bruch membrane opening, and of the anterior lamina cribrosa across 4 eyes. Overlap visibility (\*) is the common visible region of the lamina across all analyzed conditions within each eye.

**MS Word Table**

|                                 | <b>Parameters</b>       | <b>M1</b> | <b>M2</b> | <b>M3R</b> | <b>M3L</b> | <b>Average</b> |
|---------------------------------|-------------------------|-----------|-----------|------------|------------|----------------|
| <b>Scleral Canal at BMO</b>     | Area (mm <sup>2</sup> ) | 2.2       | 1.9       | 2.9        | 2.5        | 2.4            |
|                                 | Aspect ratio            | 1.3       | 1.3       | 1.3        | 1.3        | 1.3            |
|                                 | Planarity (μm)          | 6.0       | 7.5       | 6.3        | 6.4        | 6.5            |
| <b>Anterior Lamina cribrosa</b> | Visibility (%)          | 29        | 62        | 72         | 65         | 57             |
|                                 | Median depth (μm)       | 107       | 128       | 166        | 157        | 139            |
|                                 | Overlap visibility (%)* | 15        | 45        | 38         | 37         | 34             |

**Image**

|                                 | <b>Parameters</b>       | <b>M1</b> | <b>M2</b> | <b>M3R</b> | <b>M3L</b> | <b>Average</b> |
|---------------------------------|-------------------------|-----------|-----------|------------|------------|----------------|
| <b>Scleral Canal at BMO</b>     | Area (mm <sup>2</sup> ) | 2.2       | 1.9       | 2.9        | 2.5        | 2.4            |
|                                 | Aspect ratio            | 1.3       | 1.3       | 1.3        | 1.3        | 1.3            |
|                                 | Planarity (μm)          | 6.0       | 7.5       | 6.3        | 6.4        | 6.5            |
| <b>Anterior Lamina Cribrosa</b> | Visibility (%)          | 29        | 62        | 72         | 65         | 57             |
|                                 | Median depth (μm)       | 107       | 128       | 166        | 157        | 139            |
|                                 | Overlap visibility (%)* | 15        | 45        | 38         | 37         | 34             |
